# Supplementary material for: A methodological framework for the evaluation of syndromic surveillance systems: a case study of England
Source: Springer Nature journal article supplement (doi:10.1186/s12889-018-5422-9), 2018-04-24
Supplement: MOESM1 [file 15719748]

# 1 A Methodological Framework for the Evaluation of 2 Syndromic Surveillance Systems: A Case Study of 3 England

4 Felipe J Colón-González, Iain R Lake, Roger A Morbey, Alex J Elliot, Richard Pebody, Gillian E  
5 Smith

## 6 Overview of the compartmental models

7 A compartmental model is formed by a series of differential equations that estimate the number  
8 of infectious people per unit time (e.g. days) based on a range of parameters such as the  
9 transmission rate, the incubation and infectious periods of a disease [1]. In such kind of models,  
10 the individuals in a population are subdivided into categories or “compartments” for which the  
11 model tracks the course of the infection process collectively [1]. Compartmental models use  
12 differential equations to describe changes in the course of infection in continuous rather than  
13 discrete time intervals. Figure 1 depicts the structure of the two compartmental models used in  
14 the study. The direction of the solid arrows indicates the flow of individuals from a compartment  
15 to another. The dashed arrows depict the contact between an infectious source (e.g. water or  
16 an infectious individual) and susceptible individuals. Red colours indicate the presence of an  
17 exogenous source of infection.

### 18 Influenza model:

19 Here, we used a compartmental model to simulate the behaviour of a new strain assumed to  
20 behave similarly to the 2009/2010 A(H1N1)pdm09 ‘swine flu’. The model assumes that Poisson  
21 distributed infectious individuals ( $Imp$ ) randomly arrive into England with a mean  $\lambda$  of five cases  
22 per day over a 90-day period. Autochthonous transmission begins after the arrival of the first  
23 imported cases. Susceptible individuals ( $S$ ) are then infected at a rate  $\beta$  (the per capita rate  
24 at which two individuals come into effective contact [1]) after contact with an infectious person

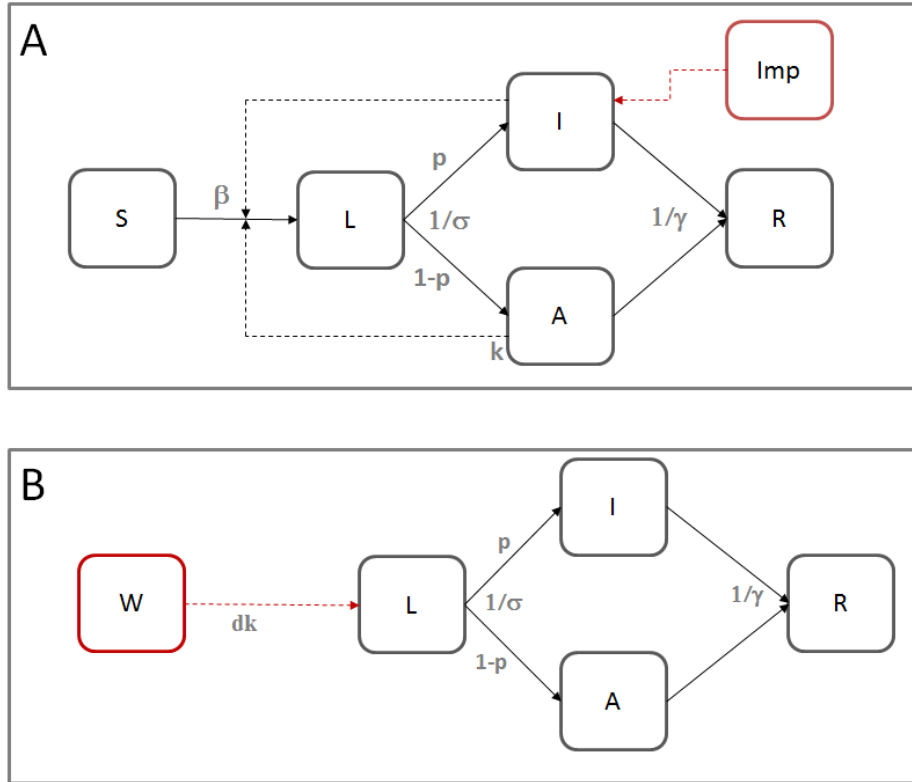

**Figure S1:** Schematic representation of the compartmental models used in the study. The model in the top (A) was used to simulate outbreaks of pandemic influenza. The model in the bottom (B) was used to simulate outbreaks of cryptosporidiosis.

25 irrespectively of whether that infectious person is symptomatic ( $I$ ) or asymptomatic ( $A$ ). Once  
 26 infected, individuals become latent ( $L$ ) carriers of the disease. In latent carriers ( $L$ ), the disease  
 27 incubates for a period of  $\sigma$  days. A proportion ( $p$ ) of latent individuals becomes infectious and  
 28 symptomatic ( $I$ ) at a rate of  $1/\sigma$  per day ( $1/\text{length of the incubation period}$ ). The remainder  
 29 ( $1-p$ ) become infectious but asymptomatic ( $A$ ) also at a rate of  $1/\sigma$  per day. Asymptomatic  
 30 individuals have their infectivity reduced by a factor ( $k$ ). Infectious individuals both symptomatic  
 31 and asymptomatic, recover ( $R$ ) at an average rate of  $1/\gamma$  per day, where  $\gamma$  represents the length  
 32 of the infectious period (in days). The equations used for pandemic influenza model were as  
 33 follows [2]:

$$\frac{dS}{dt} = -\beta S(I + kA)$$

$$\frac{dL}{dt} = \beta S(I + kA) - \sigma L$$

$$\frac{dI}{dt} = p\sigma L - \gamma I$$

$$\frac{dA}{dt} = (1 - p)\sigma L - \gamma A$$

36

$$\frac{dR}{dt} = \gamma(I + A)$$

37 where:

$$\beta = \frac{R_0}{N_0} \left[ \frac{p + k(1 - p)}{\gamma} \right]$$

$$R_0 = \beta N_0 \left[ \frac{p + k(1 - p)}{\gamma} \right]$$

$$N_0 = \text{Total population}$$

### 38 **Cryptosporidiosis model:**

39 For cryptosporidiosis, we assumed that a Poisson distributed random number of people with  
 40 mean  $\lambda$  of the population gets infected every day for a 3-day period after drinking  $k$  litres of  
 41 unboiled water from a contaminated source ( $W$ ). The probability of infection (i.e. the probability  
 42 that the oocysts can cause infection after being ingested) is represented by  $d$ . Once infected,  
 43 individuals become latent carriers of the disease ( $L$ ). In latent carriers ( $L$ ), the disease incubates  
 44 for a period of  $\sigma$  days. A proportion ( $p$ ) of latent individuals becomes infectious and symptomatic  
 45 ( $I$ ) at a rate of  $1/\sigma$  per day whilst the remainder ( $1-p$ ) become infectious but asymptomatic ( $A$ ) also  
 46 at a rate of  $1/\sigma$  per day. Infectious individuals both symptomatic and asymptomatic, recover ( $R$ )  
 47 at an average rate of  $1/\gamma$  per day, where  $\gamma$  is the length of the infectious period. The differential  
 48 equations used in this model are given by:

$$\frac{dL}{dt} = -\sigma L$$

49

$$\frac{dI}{dt} = p\sigma L - \gamma I$$

50 
$$\frac{dA}{dt} = (1 - p)\sigma L - \gamma A$$

51 
$$\frac{dR}{dt} = \gamma(I + A)$$

## 52 **Modelling assumptions**

53 The proposed models have the following shared assumptions:

- 54 1. There are no changes in the population size. We make this assumption because it is  
55 unlikely to experience significant changes in population size over the short period of the  
56 simulations.
- 57 2. Individuals are infected at random, and so all susceptible individuals have the same prob-  
58 ability of infection when in contact with an infectious source.
- 59 3. Once infected, individuals become infectious and recover at a constant rate. This assump-  
60 tion is convenient because when something typically occurs at a constant rate, such rate  
61 could be calculated as 1/average time of the event. Thus, for example, if the average incu-  
62 bation period of the parasite is four days ( $\sigma = 4$  days), the rate at which individuals become  
63 infectious equals  $1/\sigma = 1/4 = 0.25$  per day (see Figure S1).
- 64 4. Recovered individuals remain immune for the whole simulation period. This situation  
65 is likely because immunity loss would typically take a period greater than that of our  
66 simulations (maximum 365 days).

### 67 **Cryptosporidiosis-specific assumptions:**

68 Besides the shared assumptions, the model developed to simulate outbreaks of cryptosporidiosis  
69 had the following specific assumptions:

- 70 1. Infection occurs over a 3-day period after which the water supply is fully decontaminated  
71 or temporarily closed.
- 72 2. The concentration of oocysts in water remains constant over a 3-day period after which  
73 the water supply is fully decontaminated or temporarily closed.
- 74 3. The probability of infection due to contact with the contaminated water source depends  
75 on both the dose (number of oocysts per daily water intake) and the probability that a  
76 single oocyst in the inoculum successfully passes all the host's barriers to infection. The  
77 probability of infection is calculated using a hypergeometric (Beta Poisson) dose-response  
78 relation [3, 4].
- 79 4. There is no shedding of oocysts from the infectious people into the drinking water system.
- 80 5. There are no secondary infections due to person-person contact.
- 81 6. All oocysts in the water source are viable and infective.

## 82 **Outbreak size**

83 As specified in the main text, three outbreak sizes were defined for each disease. For pandemic  
84 influenza, we defined outbreak size as a function of the basic reproduction number ( $R_0$ ) which  
85 indicates the number of secondary infections expected for each primary case. The levels corre-  
86 sponding to the 10<sup>th</sup>, 50<sup>th</sup> and 90<sup>th</sup> percentiles of the range of  $R_0$  values (1.4–3.1) are presented on  
87 table 1 and are based on the established literature for pandemic influenza A(H1N1)pdm09 [5, 6, 7, 8].

**Table 1: Interpretation of the three outbreak sizes defined for each of the two diseases considered in the study.**

| Outbreak size | Interpretation                             |                                         |
|---------------|--------------------------------------------|-----------------------------------------|
|               | Influenza ( $R_0$ )                        | Cryptosporidiosis ( $\lambda$ )         |
| 1             | 1.57 Secondary infections per primary case | 854 people exposed each day for 3 days  |
| 2             | 2.25 Secondary infections per primary case | 1281 people exposed each day for 3 days |
| 3             | 2.93 Secondary infections per primary case | 8539 people exposed each day for 3 days |

88 For cryptosporidiosis, on the other hand, outbreak size was defined as a function of the number  
 89 of people consuming un-boiled contaminated water over the exposure period based on previous  
 90 studies and expert knowledge [3, 9, 10, 11, 12]. A Poisson-distributed random number of people  
 91 with mean  $\lambda$  was assumed to get exposed each day to the contaminated water source. Table 1  
 92 presents the three values of  $\lambda$  used in the study.

## 93 Summary statistics

94 The table below presents the summary statistics for each of the syndromic surveillance indicators  
 95 used in the study.

**Table 2:** Summary statistics of the modelled syndromic baseline time series (cases day<sup>-1</sup>) used in the study stratified by syndromic surveillance system and indicator.

| System                              | Indicator              | Mean  | Median | SD    | Range      |
|-------------------------------------|------------------------|-------|--------|-------|------------|
| <i>Influenza</i>                    |                        |       |        |       |            |
| EDSSS                               | Influenza-like illness | 2.1   | 1.1    | 1.8   | 0.5–10.3   |
| GPIHSS                              | Influenza-like illness | 280.9 | 164.3  | 304.8 | 0.4–1157.4 |
| GPOOHSS                             | Influenza-like illness | 50.7  | 31.5   | 54.3  | 7.3–350.0  |
| NHS-III                             | Cold/flu               | 183.4 | 144.9  | 130.6 | 39.8–995.0 |
| <i>Cryptosporidium (Location A)</i> |                        |       |        |       |            |
| EDSSS                               | Diarrhoea              | 4.1   | 4.0    | 0.6   | 2.9–5.9    |
| GPIHSS                              | Diarrhoea              | 287.0 | 377.5  | 195.4 | 0.5–599.5  |
| GPOOHSS                             | Diarrhoea              | 31.8  | 22.7   | 16.0  | 16.8–77.4  |
| NHS-III                             | Diarrhoea              | 75.9  | 62.3   | 30.9  | 39.1–190.1 |
| <i>Cryptosporidium (Location B)</i> |                        |       |        |       |            |
| EDSSS                               | Diarrhoea              | 0.8   | 0.8    | 0.1   | 0.4–1.3    |
| GPIHSS                              | Diarrhoea              | 14.4  | 18.7   | 9.7   | 0.1–29.4   |
| GPOOHSS                             | Diarrhoea              | 0.4   | 0.2    | 0.4   | 0.1–1.5    |
| NHS-III                             | Diarrhoea              | 9.0   | 5.4    | 6.1   | 3.3–24.6   |
| <i>Cryptosporidium (Location C)</i> |                        |       |        |       |            |
| EDSSS                               | Diarrhoea              | <0.1  | <0.1   | <0.1  | 0.0–<0.1   |
| GPIHSS                              | Diarrhoea              | 21.2  | 27.3   | 14.8  | 0.1–47.3   |
| GPOOHSS                             | Diarrhoea              | 3.5   | 1.9    | 4.4   | 0.1–15.1   |
| NHS-III                             | Diarrhoea              | 10.6  | 7.0    | 6.2   | 4.7–26.9   |

## 96 Comparing observed vs. simulated outbreaks

97 Figure S1 shows the behaviour of the 243 outbreaks of cryptosporidiosis and pandemic influenza  
98 used in this study. Simulated outbreak data are represented by the gray lines, and are presented  
99 here scaled by the proportion of people estimated to consult the GPIHSS syndromic surveillance  
100 system, the proportional coverage of such syndromic surveillance system for location A (cryp-  
101 tosporidiosis) and the whole of England (influenza), and the percentage of people coded with  
102 either the diarrhoea or influenza-like illness indicators. For comparative purposes, we included  
103 historic data (in red) about outbreaks of both diseases that occurred in the United Kingdom in  
104 recent times [13, 14]. As can be observed, the range of simulated data covers the time span and  
105 magnitude of the historic outbreak data.

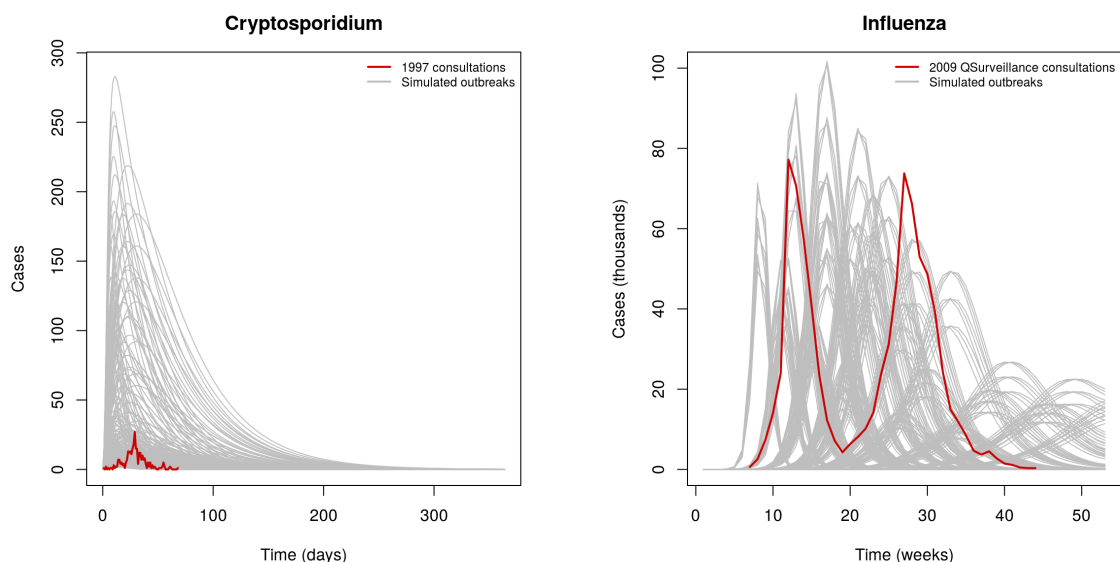

**Figure S2:** Simulated number of consultations for diarrhoea and influenza-like-illness (gray lines) for the GPIHSS system. Historic observed outbreaks (red lines) are presented as a reference.

106 Several of the simulated *Cryptosporidium spp.* outbreaks shown on Figure S2 were considerably  
107 larger than the historical outbreak whilst most of the simulated pandemic influenza outbreaks  
108 were smaller than their corresponding historical data. Figure S2 however, demonstrates that once  
109 simulated outbreaks of size 3 are converted to syndromic data, the increase in the expected  
110 number of people infected with cryptosporidiosis is rather small and so, some outbreaks may go  
111 unnoticed by the detection algorithm. Conversely, for pandemic influenza the expected number  
112 of extra cases due to the simulated outbreaks is considerably larger than the baseline and

113 outbreaks are likely to be easily detected.

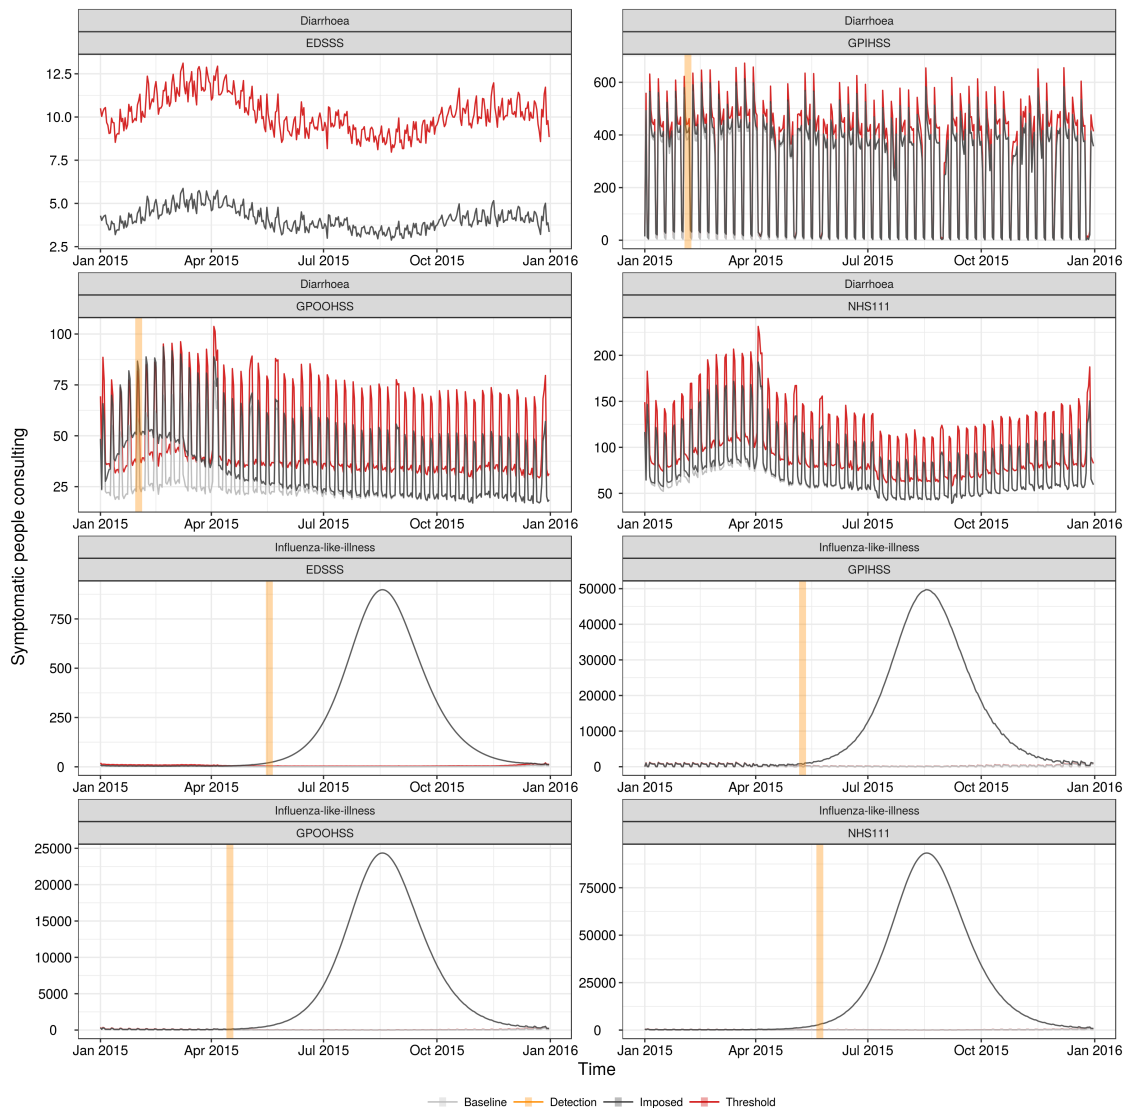

**Figure S3:** Graphical representation of the evaluation algorithm for outbreaks of size 3 occurring in a metropolitan area (cryptosporidiosis) or across the whole of England (influenza) with onset on 1 January 2015, stratified by disease and syndromic indicator. The light gray lines indicate the baseline syndromic surveillance data; the dark gray lines depict an average evaluation time series (i.e. imposed outbreak data); the red lines represent the statistical alarm threshold estimated with the RAMMIE model; and the vertical thick orange lines indicate the median time to detection.

## 114 Alarm Thresholds

115 The detection algorithm used as an exemplar in this paper is RAMMIE, and full details of this  
116 model are provided elsewhere [15]. Every day RAMMIE analyses more than 12,000 separate time  
117 series. The key output from RAMMIE are predictions of the mean number of system-specific and



118 indicator-specific syndromic counts (henceforth baseline data), and their corresponding alarm  
 119 thresholds (around 99% prediction intervals). These thresholds are used in the operational public  
 120 health system as a very conservative estimate of potentially unusual activity. In considering the  
 121 alarm thresholds generated by RAMMIE potential autocorrelation in the residuals were explored.  
 122 Figure S1 presents autocorrelation plots for the 14 raw data streams input into RAMMIE which  
 123 were used to generate the baselines and alarm thresholds for this paper.

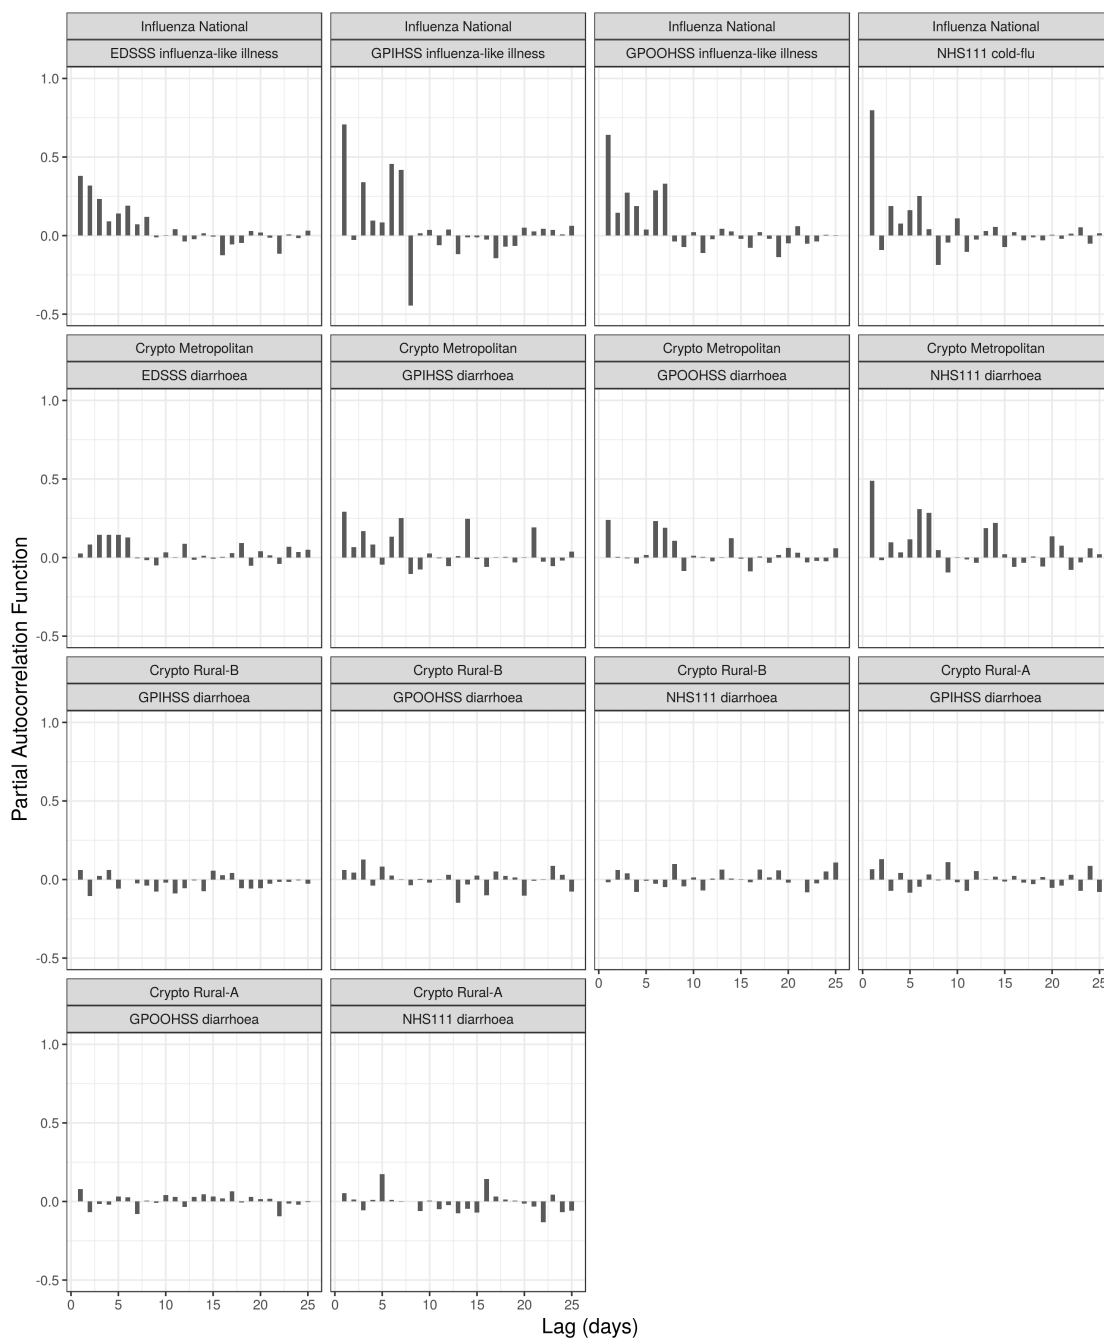

**Figure S4:** Partial autocorrelation plots for 14 RAMMIE-derived residuals from the datasets used to generate the baseline data and their corresponding alarm thresholds.

124 Overall, the mean temporal autocorrelation at 1 day lag from these 14 data streams is moderate at  
125 around 0.3. However, there is variation between data stream, and lower autocorrelations at day  
126 1 are apparent in the data streams for *Cryptosporidium* as opposed to influenza-like illness.  
127 There is also evidence that for NHSIII the autocorrelations are more short-lived (i.e. mostly on  
128 day 1). For EDSS influenza-like illness the autocorrelations spread a longer time span.

129 Automated detection systems such as RAMMIE need to be necessarily conservative (avoiding false  
130 negatives). The figures above indicate some temporal autocorrelation in the RAMMIE-derived  
131 residuals, and hence the number of statistical alarms will be greater than if this autocorrelation  
132 did not exist. This conservative approach is logical within an operational syndromic surveillance  
133 system. This contrasts to a more traditional epidemiological study where a significant result holds  
134 much greater prominence and most effort goes into reducing false positives. In an operational  
135 system “alarms” are only the first step in a long risk assessment process [16] through which only  
136 around 1 in a 1000 will result in public health action. This is the point at which reducing false  
137 positives is emphasized. There are other practical reasons why autocorrelation is difficult to take  
138 into account. An operational syndromic surveillance system needs to predict future activity and  
139 prediction intervals weeks ahead. Incorporating an autocorrelation term into models is hence  
140 challenging as the future activity is unknown.

## References

- [1] Vynnycky, E., White, R.: An Introduction to Infectious Disease Modelling. Oxford University Press
- [2] Brauer, F.: Modeling Influenza: Pandemics and Seasonal Epidemics. In: Brauer, F., van den Driessche, P., Wu, J. (eds.) *Mathematical Epidemiology*, pp. 321–347. Springer, Berlin (2008). Chap. 12
- [3] Teunis, P.F.M., Chappell, C.L., Okhuysen, P.C.: *Cryptosporidium* Dose Response Studies: Variation Between Isolates. *Risk Anal* **22**, 175–183 (2002)
- [4] Hunter, P., de Saylor, M., Risebro, H., Nichols, G., Kay, D., Hartemann, P.: Quantitative Microbial Risk Assessment of *Cryptosporidiosis* and *Giardiasis* from Very Small Private Water Supplies. *Risk Anal* **31**, 228–236 (2002)
- [5] Fraser, C., Donnelly, C., Cauchemez, S., Hanage, W., Van Kerkhove, M., Hollingsworth, T., Griffin, J., Baggaley, R., Jenkins, H., Lyons, E., Jombart, T., Hinsley, W., Grassly, N., Balloux, F., Ghani, A., Ferguson, N., Rambaut, A., Pybus, O., Lopez-Gatell, H., Alpuche-Aranda, C., Chapela, I., Zavala, E., Guevara, D., Checchi, F., Garcia, E., Hugonnet, S., Roth, C., Collaboration, W.R.P.A.: Pandemic potential of a strain of influenza A (H1N1): early findings. *Science* **324**, 1557–1561 (2009)
- [6] Lessler, J., Reich, N., Cummings, D., of Health, N.Y.C.D., Team, M.H.S.I.I., HP, H.N., Jordan, H., Thompson, N.: Outbreak of 2009 pandemic influenza A (H1N1) at a New York City school. *N Engl J Med* **361**, 2628–2636 (2009)
- [7] White, L., Wallinga, J., Finelli, L., Reed, C., Riley, S., Lipsitch, M., Pagano, M.: Estimation of the reproductive number and the serial interval in early phase of the 2009 influenza A/H1N1 pandemic in the USA. *Influenza Other Respir Viruses* **3**, 267–276 (2009)
- [8] Yang, Y., Sugimoto, J., Halloran, M., NE, N.B., Chao, D., Matrajt, L., Potter, G., E, E.K., Longini, I.: The transmissibility and control of pandemic influenza A (H1N1) virus. *Science* **326**, 729–733 (2009)

- 167 [9] Puleston, R., Mallaghan, C., Modha, D., Hunter, P., Nguyen-Van-Tam, J., Regan, C., Nichols, G.,  
168 Chalmers, R.: The first recorded outbreak of cryptosporidiosis due to *Cryptosporidium cu-*  
169 *niculus* (formerly rabbit genotype), following a water quality incident. *J Water Health* **12**, 41–50  
170 (2014)
- 171 [10] Hagen, R.M., Loderstaedt, U., Frickmann, H.: An evaluation of the potential use of *Cryp-*  
172 *tosporidium* species as agents for deliberate release. *J R Army Med Corps* **160**, 289–94 (2014)
- 173 [11] Dorevitch, S., DeFlorio-Barker, S., Jones, R.M., Liu, L.: Water quality as a predictor of gastroin-  
174 testinal illness following incidental contact water recreation. *Water Res* **83**, 94–103 (2015)
- 175 [12] Ridderstedt, F., Widerström, M., Lindh, J., Lilja, M.: Sick leave due to diarrhea caused by con-  
176 tamination of drinking water supply with *Cryptosporidium hominis* in Sweden: a retrospective  
177 study. *J Water Health* **In Press**, 1–7 (2017)
- 178 [13] Willocks, L., Crampin, A., Milne, L., Seng, C., Susman, M., Gair, R., Mousdale, M., Shafi, S.,  
179 Wall, R., Wiggins, R., Lightfoot, N.: A large outbreak of cryptosporidiosis associated with a  
180 public water supply from a deep chalk borehole. Outbreak Investigation Team. *Commun Dis*  
181 *Public Health* **1**, 239–243 (1998)
- 182 [14] Pebody, R., McLean, E., Zhao, H., Cleary, P., Bracebridge, S., Foster, K., Charlett, A., Hardelid,  
183 P., Waight, P., Ellis, J., Bermingham, A., Zambon, M., Evans, B., Salmon, R., McMenamin, J.,  
184 Smyth, B., Catchpole, M., Watson, J.: Pandemic Influenza A (H1N1) 2009 and Mortality in the  
185 United Kindgom: Risk Factors for Death, April 2009 to March 2010. *Eurosuveillance* **15**, 1–11  
186 (2010)
- 187 [15] Morbey, R.A., Elliot, A.J., Charlett, A., Verlander, N.Q., Andrews, N., Smith, G.E.: The application  
188 of a novel "rising activity, multi-level mixed effects, indicator emphasis" (RAMMIE) method for  
189 syndromic surveillance in England . *Bioinformatics* **31**, 3660–3665 (2015)
- 190 [16] Smith, G.E., Elliot, A.J., Ibbotson, S., Morbey, R.A., Edeghere, O., Hawker, J., Catchpole, M.,  
191 Endericks, T., Fisher, P., McCloskey, B.: Novel public health risk assessment process developed  
192 to support syndromic surveillance for the 2012 Olympic and Paralympic Games. *J Public Health*  
193 (Oxf), 1–7 (2016)
